# Supplementary material
Source: PubMed Central journal article supplement (PMC9944510)
Supplement: NIHMS1869568-supplement-SI.pdf [file NIHMS1869568-supplement-SI.pdf]

Supplementary Information

**Engineered Protein Nanocages for Concurrent  
RNA and Protein Packaging *In Vivo***

Seokmu Kwon<sup>1</sup> and Tobias W. Giessen<sup>2,3\*</sup>

<sup>1</sup>Department of Chemical Engineering, University of Michigan, Ann Arbor, MI 48109, USA

<sup>2</sup>Department of Biological Chemistry, University of Michigan Medical School, Ann Arbor, MI 48109, USA

<sup>3</sup>Department of Biomedical Engineering, University of Michigan Medical School, Ann Arbor, MI 48109, USA

\*correspondence: tgiessen@umich.edu

Content: Figures S1-S5, Tables S1-S2

**A**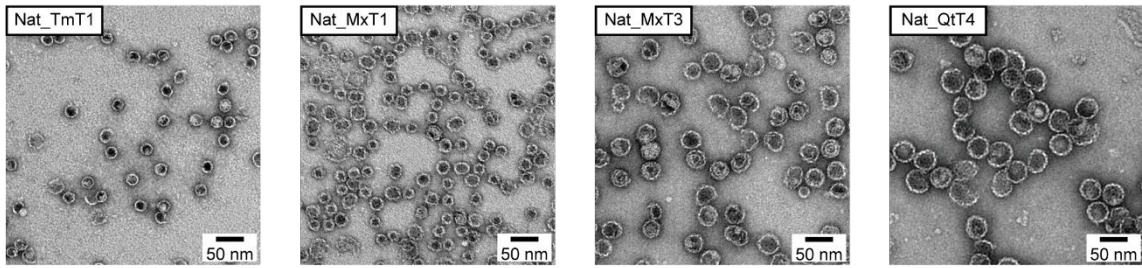**B**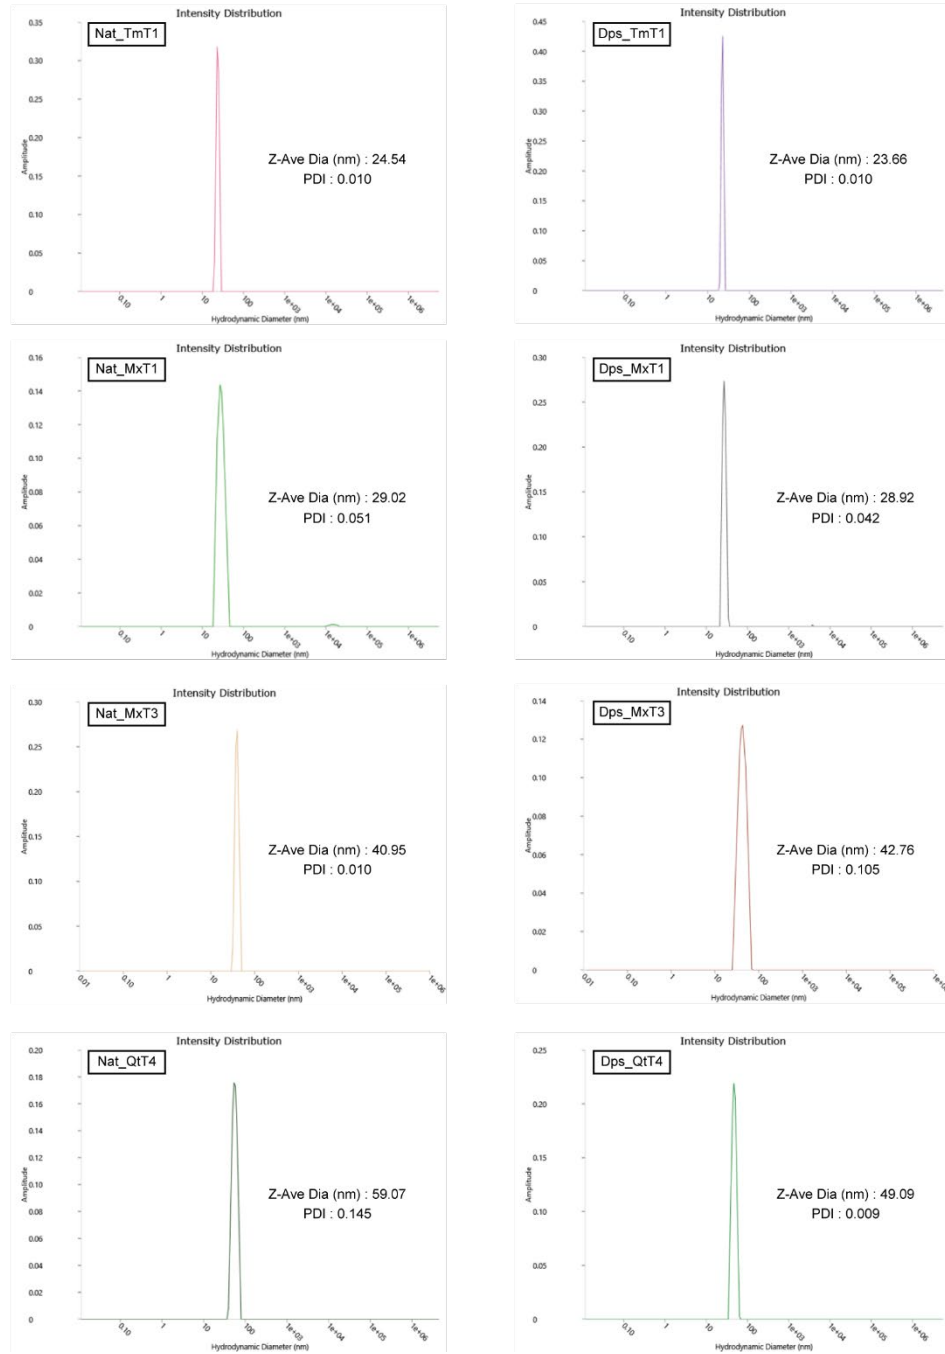

C

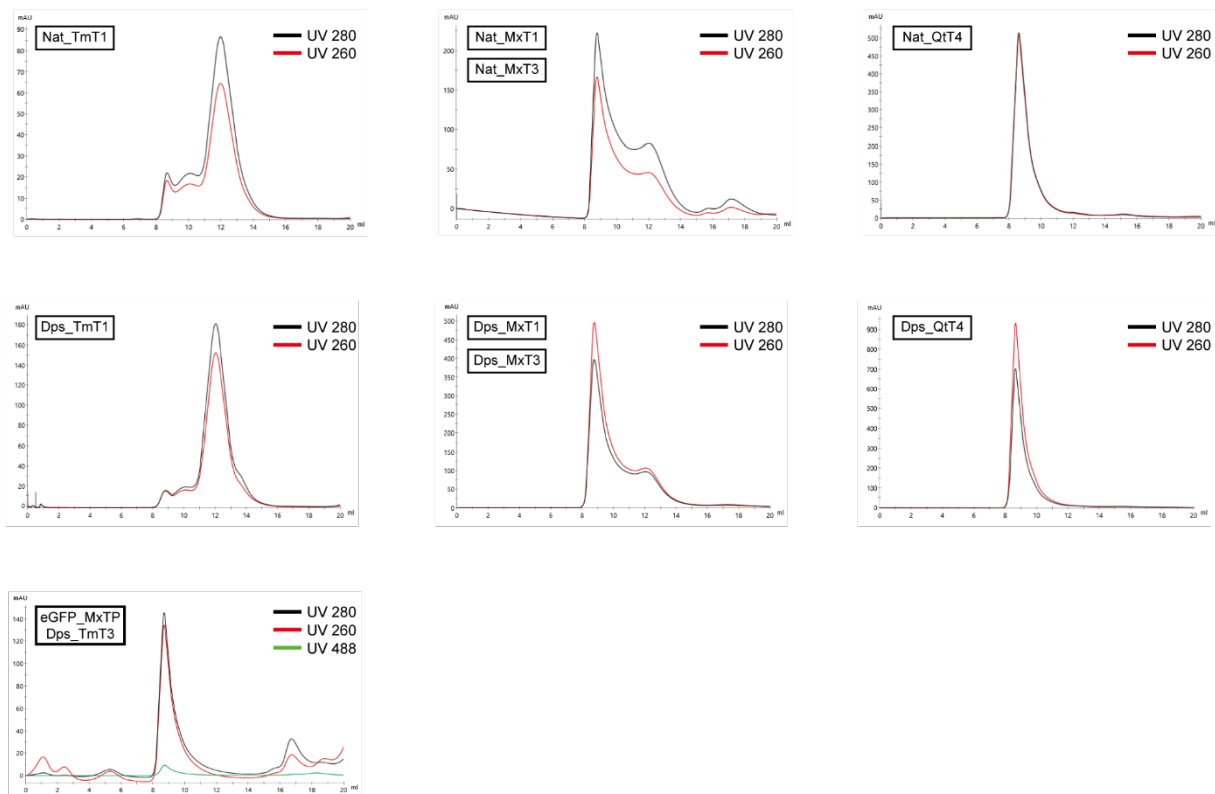

D

|                       | Collected elution volume from SEC (ml) | A260/A280 |
|-----------------------|----------------------------------------|-----------|
| Nat_TmT1              | 11 – 13                                | 0.76      |
| Dps_TmT1              | 11 – 13                                | 0.86      |
| Nat_MxT1              | 11 – 13                                | 0.64      |
| Dps_MxT1              | 11 – 13                                | 1.11      |
| Nat_MxT3              | 8 – 10                                 | 0.77      |
| Dps_MxT3              | 8 – 10                                 | 1.24      |
| Nat_QtT4              | 8 – 10                                 | 0.98      |
| Dps_QtT4              | 8 – 10                                 | 1.33      |
| eGFP_MxTP<br>Dps_MxT3 | 8 – 10                                 | 0.96      |

E

|                    | Amount of used protein for RNA extraction (ug) | Amount of extracted RNA (ng) | Amount of packaged RNA per 1 mol shell (kg/mol) |
|--------------------|------------------------------------------------|------------------------------|-------------------------------------------------|
| Dps_TmT1           | 350.4                                          | 1358                         | 7.5                                             |
| Dps_MxT1           | 66.69                                          | 1309                         | 39.2                                            |
| Dps_MxT3           | 360.875                                        | 5775                         | 95.9                                            |
| Dps_QtT4           | 356.8                                          | 5264                         | 119.8                                           |
| eGFP_MxTP<br>_MxT3 | 170.4                                          | 1995                         | 70.2                                            |

**Figure S1.** A) Negative-stain TEM micrographs of all four purified Nat\_Encs. B) Dynamic light scattering (DLS) analysis of Nat\_Encs (left) and Dps\_Encs (right). Z-average diameter and polydispersity index (PDI) for each sample are shown next to the peak. C) Size-exclusion chromatography (SEC) analysis of Nat\_Encs (top), Dps\_Encs (middle), and eGFP\_MxTP\_Dps\_MxT3 (bottom). UV 280 tracking the protein signal is shown in black line and UV 260 tracking the nucleic acid signal is shown in red line and UV 488 tracking the eGFP signal is shown in green line. D) Table showing the collected elution volume for each Nat\_Enc, Dps\_Enc, and eGFP\_MxTP\_Dps\_MxT3 from the respective SEC runs (second column) and the direct A260/A280 measurement of the collected and concentrated Nat\_Encs, Dps\_Encs, and eGFP\_MxTP\_Dps\_MxT3 (third column). E) Table showing the absolute amount of RNA extracted from given amount of each Nat\_Enc, Dps\_Enc, and eGFP\_MxTP\_Dps\_MxT3. Amount of packaged RNA per shell is also shown in the last column. Since Dps\_MxT1 sample partially contained Dps\_MxT3 as shown in Figure 1D and Figure 4, the amount of extracted RNA accounting for sole Dps\_MxT1 would be less than is shown here.

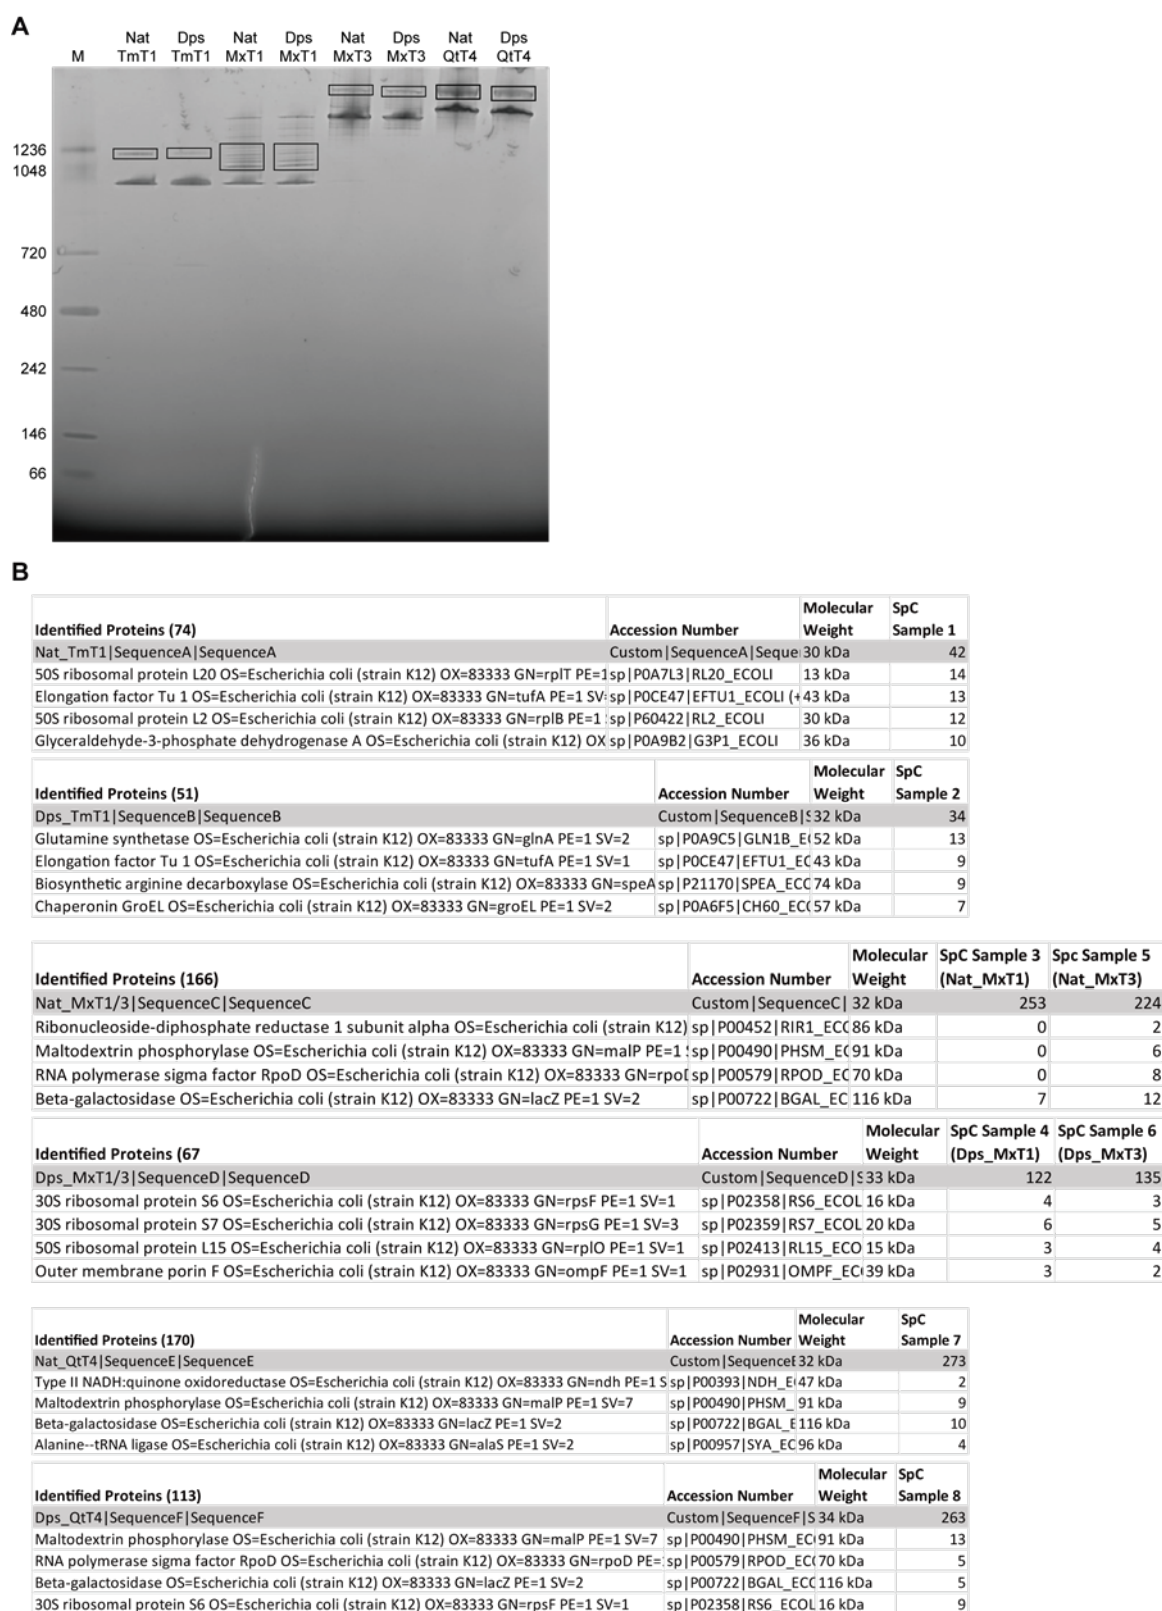

**Figure S2.** A) Native PAGE gel analysis of Nat\_Encs and Dps\_Encs stained with Coomassie Blue to visualize protein. Minor higher molecular weight bands for each Nat\_Enc and Dps\_Enc that were subjected to mass spectrometry identification are indicated by black boxes. B) Mass spectrometry results showing that all higher molecular weight bands represent the respective Nat\_Encs or Dps\_Encs. Only the top 5 most prevalent protein species are shown. Nat\_Encs and Dps\_Encs sequences are highlighted in grey.

|                                                                               | Dps_TmT1 | Dps_MxT1 | Dps_MxT3 | Dps_QtT4 |
|-------------------------------------------------------------------------------|----------|----------|----------|----------|
| Change in luminal charges upon Dps_N fusion                                   | +180     | +180     | +540     | +720     |
| Change in luminal surface charge density upon Dps_N fusion(nm <sup>-2</sup> ) | +0.177   | +0.398   | +0.254   | +0.177   |

**Figure S3.** Table showing the change in luminal charge and approximate luminal surface charge density upon Dps-N fusion in engineered Dps\_Encs. Encapsulin shell thickness was assumed to be 3 nm. Interior surface area was calculated as follows:  $4\pi r^2$  with  $r = \text{shell radius} - 3 \text{ nm}$ , e.g., Tm:  $r = 12 \text{ nm} - 3 \text{ nm} = 9 \text{ nm}$ . To obtain approximate luminal charge densities, we assumed the native luminal charge to be approximately neutral (or at least negligible, compared to the charge increase caused by Dps-N). Approximate luminal charge was calculated as follows:  $3 \times \# \text{ of protomers} / \text{interior surface area}$ .

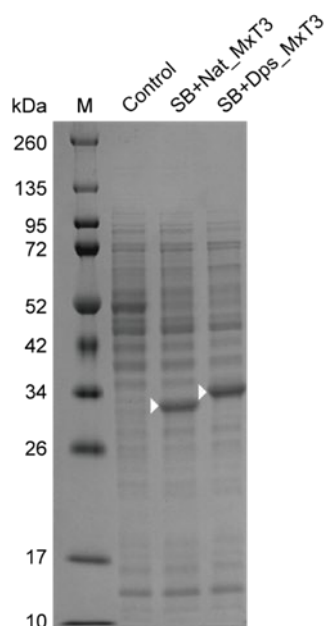

**Figure S4.** SDS-PAGE analysis of cell lysates from the control *E.coli* BL21(DE3) strain without any transformed plasmid, SB+Nat\_MxT3, and SB+Dps\_MxT3, showing that Nat\_MxT3 and Dps\_MxT3 are properly expressed at comparable levels. Bands corresponding to Nat\_MxT3 and Dps\_MxT3 are indicated by white arrows.

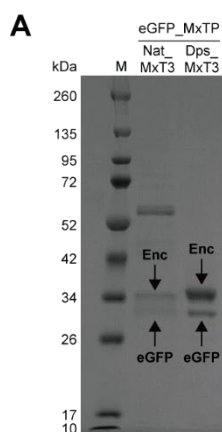

**B**

|                                                   | eGFP_MxTP_Nat_MxT3 | eGFP_MxTP_Dps_MxT3 |
|---------------------------------------------------|--------------------|--------------------|
| eGFP_MxTP to capsid protomer band intensity ratio | 0.22               | 0.20               |

**Figure S5.** Comparison of cargo-loading capacity of Nat\_MxT3 and Dps\_MxT3. A) SDS-PAGE analysis of purified eGFP-loaded Nat\_MxT3 and Dps\_MxT3 stained with Coomassie. B) Table showing the eGFP\_MxTP to shell protomer band intensity ratio based on gel densitometry.

**Table S1.** Protein sequences of all proteins used in this study.

| Construct  | Protein sequence                                                                                                                                                                                                                                                                                                                 |
|------------|----------------------------------------------------------------------------------------------------------------------------------------------------------------------------------------------------------------------------------------------------------------------------------------------------------------------------------|
| Nat_TmT1   | MEFLKRSFAPL TEKQWQEIDNRAREIFKTQLYGRKFVDVEGPGYWEYAAHPLGEVEVLSDENEV<br>VKWGLRKSLPLIELRATFTLDLWELDNLERGKPNVDLSSLEETVRKVAEFEDEVIFRGCEKSGVK<br>GLLSFEERKIECGSTPKDLLEAIVRALSIFSCKDIEGYPYTLVINTDRWINFLKEEAGHYPLEKRVEE<br>CLRGGKIITTPRIEDALVVSEGGDFKLILGQDLSIGYEDREKDAVRLFITETFTFQVWNPEALILLK<br>F                                       |
| Nat_MxT1/3 | MPDFLGHAEENPLREEEWARLNETVIQVARRSLVGRRILDIYGPLGAGVQTVPYDEFQGVSPGAV<br>DIVGEQETAMVFTDARKFKTIPIIYKDFLLHWRDIEAARTHNMPLDVSAAGAAALCAQQEDELIF<br>YGDARLGYEGLMTANGRLTVPLGDWTSPPGGGFQAIVEATRKLNEQGHFGPYAVVLSPRLYSQL<br>HRIYEKTVLEIETIRQLASDGVYQSNRLRGESGVVSTGRENMDLAVSMDMVAAYLGASRMN<br>HPFRVLEALLLRIKHPDAICTLEGAGATERR                   |
| Nat_QtT4   | MNKSQLYPDSPLTDQDFNQLDQTVIEAARRQLVGRRFIELYGPLGRGMQSVFNDIFMESHEAKM<br>DFQGSFDTEVESSRRVNYTIPMLYKDFVLWYRDLEQSKALDIPIDFSVAANAARDVAFLEDQMIF<br>HGSKEFDIPGLMNVKGRLLHIGNWYESGNFQDIVEARNKLLMNHNGPYALVLSPELYSLLH<br>RVHKDTNVLEIEHVRELITAGVFQSPVLKKGSGVIVNTGRNNLDLAISEDFTAYLGEEGMNHPPF<br>RVYETVWLRKRPAAICTLIDPEE                           |
| Dps_TmT1   | MSTAKLVKSKATNGGSGGSEFLKRSFAPL TEKQWQEIDNRAREIFKTQLYGRKFVDVEGPGYGW<br>EYAAHPLGEVEVLSDENEVVKWGLRKSLPLIELRATFTLDLWELDNLERGKPNVDLSSLEETVRK<br>VAEFEDEVIFRGCEKSGVKGLLSFEERKIECGSTPKDLLEAIVRALSIFSCKDIEGYPYTLVINTDRW<br>INFLKEEAGHYPLEKRVEECLRGGKIITTPRIEDALVVSEGGDFKLILGQDLSIGYEDREKDAVRL<br>FITETFTFQVWNPEALILLKF                    |
| Dps_MxT1/3 | MSTAKLVKSKATNGGSGGSPDFLGHAEENPLREEEWARLNETVIQVARRSLVGRRILDIYGPLGA<br>GVQTVPYDEFQGVSPGAVDIVGEQETAMVFTDARKFKTIPIIYKDFLLHWRDIEAARTHNMPLDV<br>SAAGAAALCAQQEDELIFYGDARLGYEGLMTANGRLTVPLGDWTSPPGGGFQAIVEATRKLNE<br>QGHFGPYAVVLSPRLYSQLHRIYEKTVLEIETIRQLASDGVYQSNRLRGESGVVSTGRENMD<br>LAVSMDMVAAYLGASRMNHPFRVLEALLLRIKHPDAICTLEGAGATERR |
| Dps_QtT4   | MSTAKLVKSKATNGGSGGSNKSQLYPDSPLTDQDFNQLDQTVIEAARRQLVGRRFIELYGPLGR<br>GMQSVFNDIFMESHEAKMDFQGSFDTEVESSRRVNYTIPMLYKDFVLWYRDLEQSKALDIPIDF<br>SVAANAARDVAFLEDQMIFHGSKEFDIPGLMNVKGRLLHIGNWYESGNFQDIVEARNKLLM<br>NHNGPYALVLSPELYSLLHRVHKDTNVLEIEHVRELITAGVFQSPVLKKGSGVIVNTGRNNLDLAI<br>SEDFETAYLGEEGMNHPPFRVYETVWLRKRPAAICTLIDPEE        |
| eGFP_MxTP  | MVSKGEELFTGVVPIVELDGDVNGHKFSVSGEGGDATYGKLTCLKFICTTGKLPVPWPTLVTTL<br>TYGVQCFSRYPDHMKQHDFFKSAMPEGYVQERTIFFKDDGNYKTRAEVKFEGLDNLNRIELKGI<br>DFKEDGNILGHKLEYNYNSHNVIYIMADKQKNGIKVNFKIRHNIEDGSVQLADHYQQNTPIGDGP<br>VLLPDNHVLSLQSAKSDPNEKRDMVLEFVTAAGITLGMDELYKGGSGGSPEKRLTVGSLRR                                                       |

**Table S2.** DNA sequences of primer and Split\_Broccoli used in this study.

|                                    | DNA sequence                                                                                                                                                                                                                                                                                                                                                                                                                                                                                                                                                                                                                                                                                                                                                                                         |
|------------------------------------|------------------------------------------------------------------------------------------------------------------------------------------------------------------------------------------------------------------------------------------------------------------------------------------------------------------------------------------------------------------------------------------------------------------------------------------------------------------------------------------------------------------------------------------------------------------------------------------------------------------------------------------------------------------------------------------------------------------------------------------------------------------------------------------------------|
| Dps_TmT1<br>overhang<br>primer_F   | AAGTATAAGAAGGAGATATACAATGTCTACCGCCAAGCTCGTAAAAAGTAAAGCAACGAACG<br>GTGGTAGCGGTGGCTCCGAATTCCTAAAGCGCAGTTTTGC                                                                                                                                                                                                                                                                                                                                                                                                                                                                                                                                                                                                                                                                                           |
| Dps_TmT1<br>primer_R               | GCAGCAGCCTAGGTTAATTC                                                                                                                                                                                                                                                                                                                                                                                                                                                                                                                                                                                                                                                                                                                                                                                 |
| Dps_MxT1/3<br>overhang<br>primer_F | AAGTATAAGAAGGAGATATACAATGAGCACGGCAAATTGGTGAAATCGAAAGCAACGAACG<br>GTGGTAGTGGTGGCAGCCCGACTTTCTGGGGCATG                                                                                                                                                                                                                                                                                                                                                                                                                                                                                                                                                                                                                                                                                                 |
| Dps_MxT1/3<br>primer_R             | GCAGCAGCCTAGGTTAATTCAG                                                                                                                                                                                                                                                                                                                                                                                                                                                                                                                                                                                                                                                                                                                                                                               |
| Dps_QtT4<br>overhang<br>primer_F   | AAGTATAAGAAGGAGATATACAATGTCAACCGCGAAGTTGGTCAAGTCAAAGCTACTAACG<br>GTGGGTCAGGGGGCTCAAATAAGAGTCAACTGTATCCGG                                                                                                                                                                                                                                                                                                                                                                                                                                                                                                                                                                                                                                                                                             |
| Dps_QtT4<br>primer_R               | GCAGCAGCCTAGGTTAATTCAC                                                                                                                                                                                                                                                                                                                                                                                                                                                                                                                                                                                                                                                                                                                                                                               |
| Split_Broccoli                     | <p>TAATACGACTCACTATAGGATGATGGAGACGGTCCGGTCCAGGATCATTTCATGGCAAGAGA<br/> CGGTCCGGTCCAGATGATGCGGATCAAAGCCCCGAAAGGCGGGCTTTTTTTAAGCTTGC<br/> ATGCCTGCAGGTGCGACTCTAGAGGATCCCCGGGTACCGAGCTCGAATTCAGTGGCCGTCGT<br/> TTTACAACGTCGTGACTGGGAAAACCCTGGCGTTACCCAACTTAATCGCCTTGCAGCACATC<br/> CCCCTTTCGCCAGCTGGCGTAATAGCGAAGAGGCCCGCACCGATCGCCCTCCCAACAGTT<br/> GCGCAGCCTGAATGGCGAATGGCGCCTGATGCGGTATTTTCTCCTTACGCATCTGTGCGGT<br/> ATTTACACCCGCATATGTAATACGACTCACTATAGGATCCGCATCATCTGTGAGTAGAGTGT<br/> GGGCTCTTGCCATGTGTATGTGGTCAACCCACATACTCTGATGATCCTGTGAGTAGAGTG<br/> TGGGCTCCATCATCCTAGCATAACCCCTTGGGGCCTCTAAACGGGTCTTGAGGGGTTTTTG</p> <p>Green : T7 promoter<br/> Blue : Split_Broccoli_TOP<br/> Red : T500 terminator<br/> Orange : spacer<br/> Purple : Split_Broccoli_Bottom<br/> Pink : T7 terminator</p> |
